# Supplementary material
Source: MDPI journal article supplement (https://www.mdpi.com/2673-9976/6/1/78)
Supplement: s1 [file s1]

# CHARACTERIZATION OF POLYPHENOLIC COMPOSITION OF EXTRACTS FORM WINERY WASTES BY HPLC-UV-MS/MS

Iris Carretero<sup>a</sup>, Mercè Granados<sup>a</sup>, Javier Saurina<sup>a,b</sup>, Sònia Sentellas<sup>a,c</sup>

a Department of Chemical Engineering and Analytical Chemistry, University of Barcelona, Martí i Franquès 1-11, E08028 Barcelona, Spain.  
b Research Institute in Food Nutrition and Food Safety, University of Barcelona, Av. Prat de la Riba 171, Edifici Recerca (Gaudí), E08921 Santa Coloma de Gramenet, Spain.  
c Serra Hùnter Lecturer, Generalitat de Catalunya, Spain.

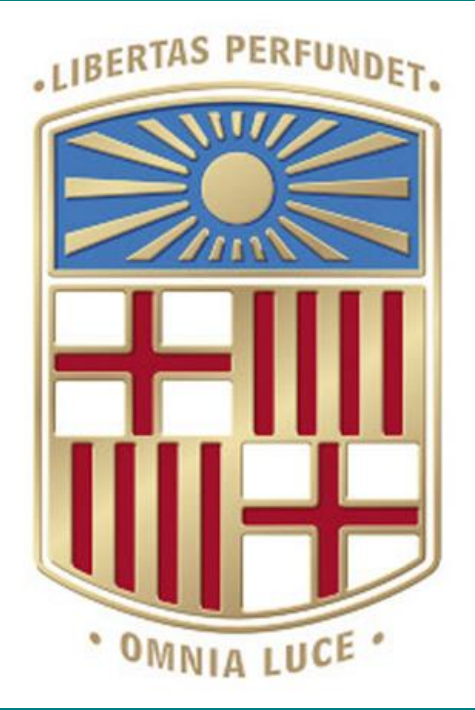

## INTRODUCTION

Polyphenols display a wide range of positive health effects, thus contributing to the prevention or treatment of some diseases due to their great antioxidant, anti-inflammatory, antimicrobial and antineoplastic properties. The use of polyphenols is not limited to pharmaceutical purposes, but they are also applied to cosmetics, nutraceuticals, etc.

Currently, there is a growing interest in the recovery of polyphenols from agrifood wastes. In particular, winery wastes are especially rich in phenolic compounds. Recovery consists of several stages, including extraction and purification, but also chemical characterization.

This work aims at characterizing the polyphenols recovered from wastes generated during the winemaking processes using chromatographic techniques.

## MATERIALS AND METHODS

### SAMPLES

Samples are aqueous extracts, obtained from wine lees, and submitted to ultrafiltration or reversed osmosis purification processes.

### HIGH PERFORMANCE LIQUID CHROMATOGRAPHY

|                  |                                                                                             |
|------------------|---------------------------------------------------------------------------------------------|
| Chromatograph    | Agilent Series 1200 HPLC equipped with diode array detector                                 |
| Column           | Kinetex C18 (100 mm x 4.6 mm, 2.6 μm)                                                       |
| Mobile phase     | Solvent A: 0.1% formic acid in water; Solvent B: acetonitrile                               |
| Elution program  | Time (min), % B: (0, 3%), (10, 15%); (20, 45%); (22, 90%); (24, 90%); (24.2, 3%); (30, 3%). |
| Flow rate        | 0.7 mL min <sup>-1</sup>                                                                    |
| Injection volume | 5 μL                                                                                        |
| UV detection     | 250, 280, 325 and 370 nm                                                                    |

### MASS SPECTROMETRY

|                        |                          |                                                         |
|------------------------|--------------------------|---------------------------------------------------------|
| Mass spectrometer      | 4000 Qtrap (AB Sciex)    | LTQ Orbitrap Velos (Thermo Fisher Scientific)           |
| Resolution             | Low                      | 60,000 FWHM (at m/z 200)                                |
| Mode                   | Enhance MS (m/z 100-650) | Full scan (m/z 100-1500)<br>Data-dependent scan (MS/MS) |
| Polarity               | negative                 |                                                         |
| Source voltage         | -2500V                   |                                                         |
| Source temperature     | 700 °C                   | 350 °C                                                  |
| Capillary temperature  | ---                      | 320 °C                                                  |
| Declustering potential | -80 V                    | ---                                                     |
| S-Lens RF voltage      | ---                      | 50 V                                                    |
| Gas (N <sub>2</sub> )  | 20 a.u. (CUR)            | 60 a.u. (HESI-II sheath)                                |
|                        | 50 a.u. (GS1)            | 0 a.u. (ion-sweep)                                      |
|                        | 50 a.u. (GS2)            | 10 a.u. (auxiliary)                                     |

## RESULTS AND DISCUSSION

The HPLC-UV chromatogram (Figure 1) indicates that wine lees extracts are quite complex. This work focuses on the identification of the most remarkable phenolic compounds.

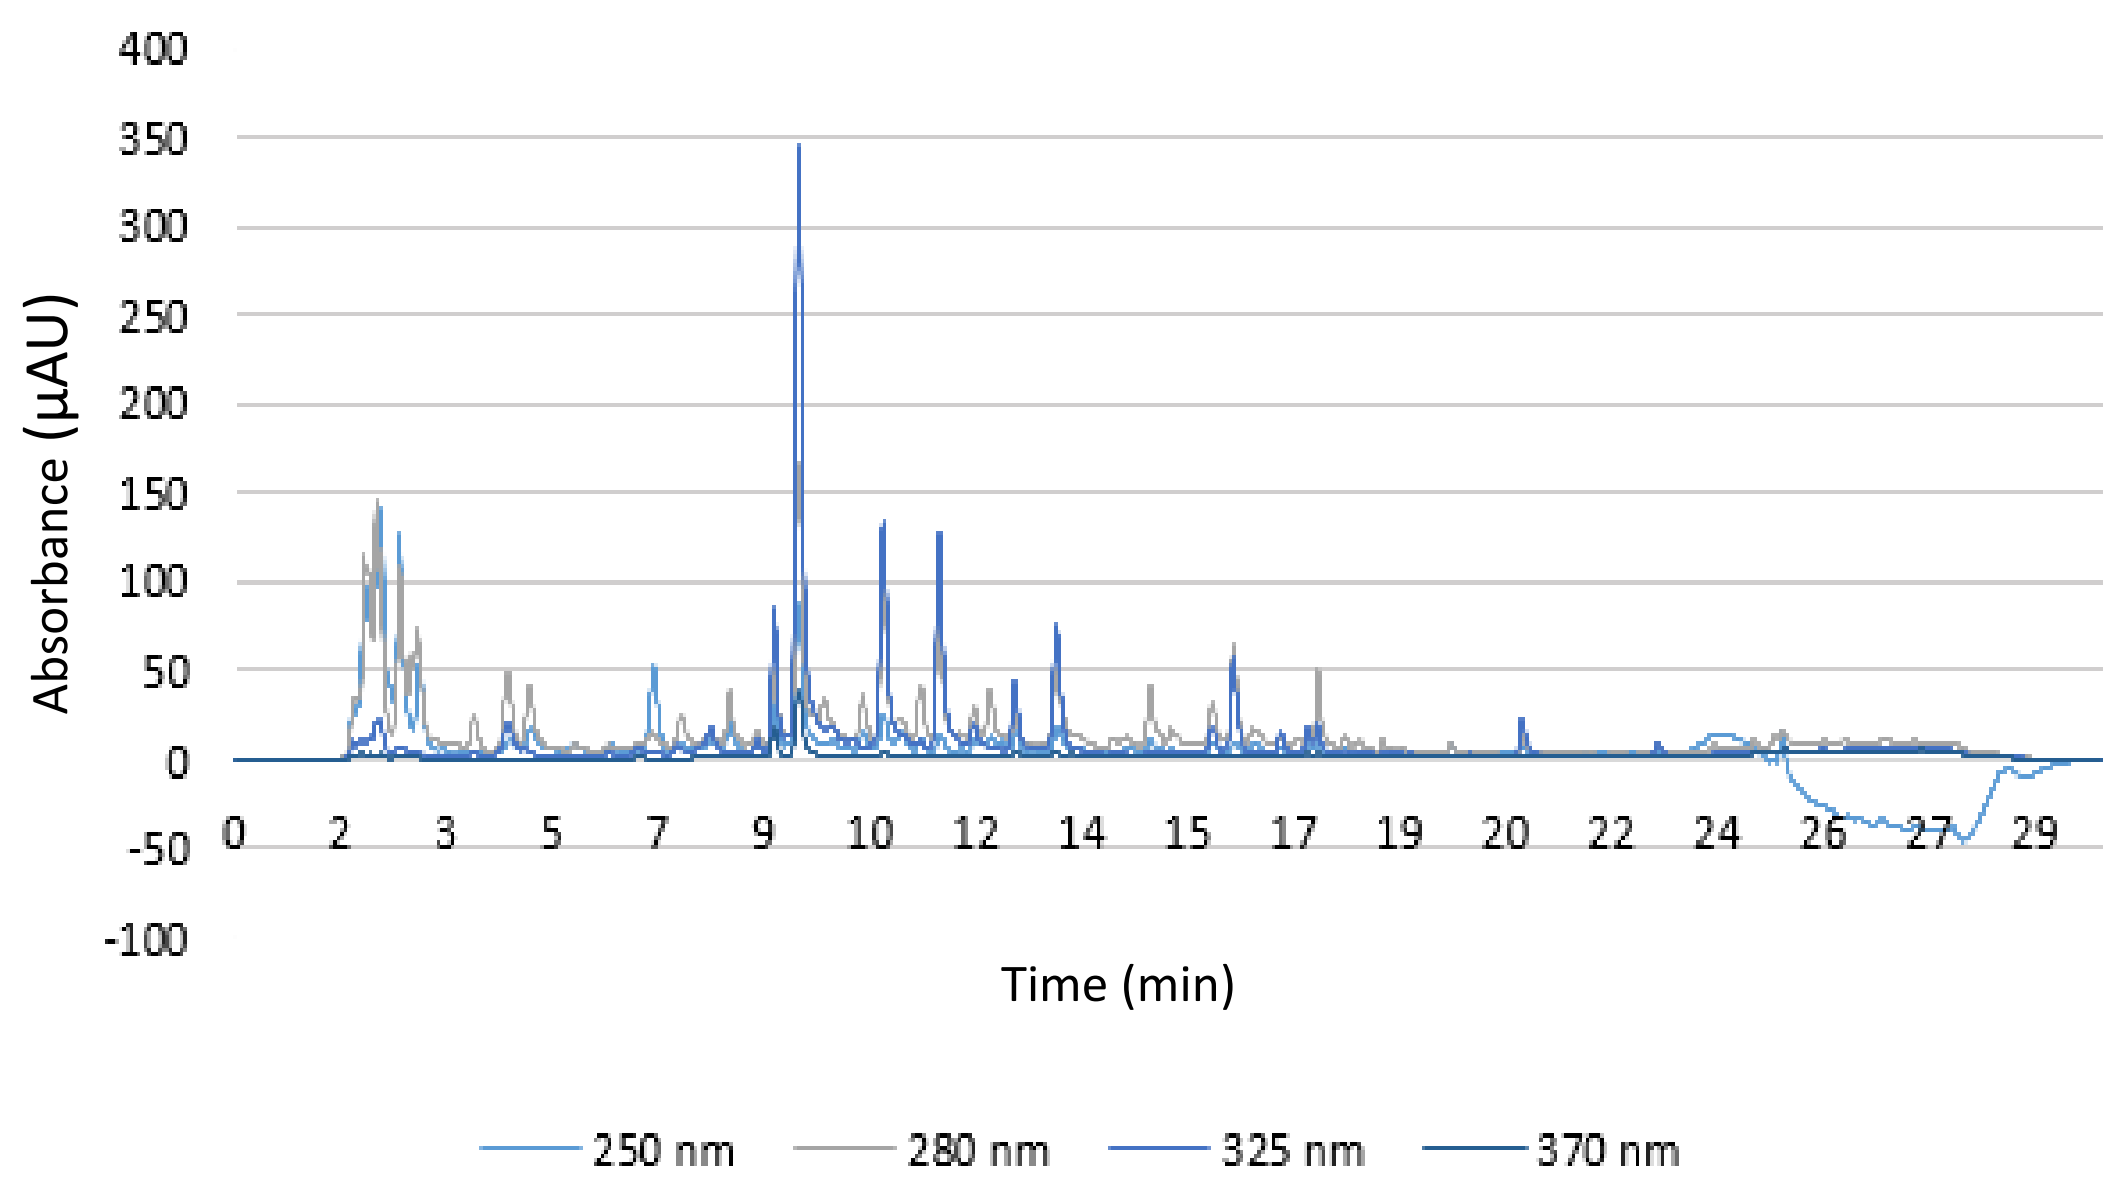

Figure 1. HPLC-UV chromatograms of an aqueous lees extract.

### COMPOUND IDENTIFICATION USING MASS SPECTROMETRY

Both LRMS and HRMS were applied to confirm the identity of phenolic compounds in wine lees extracts. Different strategies and acquisition modes were used.

### HPLC-LRMS

**Full scan mode:** The MS spectrum of the suspect peak was compared with that of the standard when available (Figure 2).

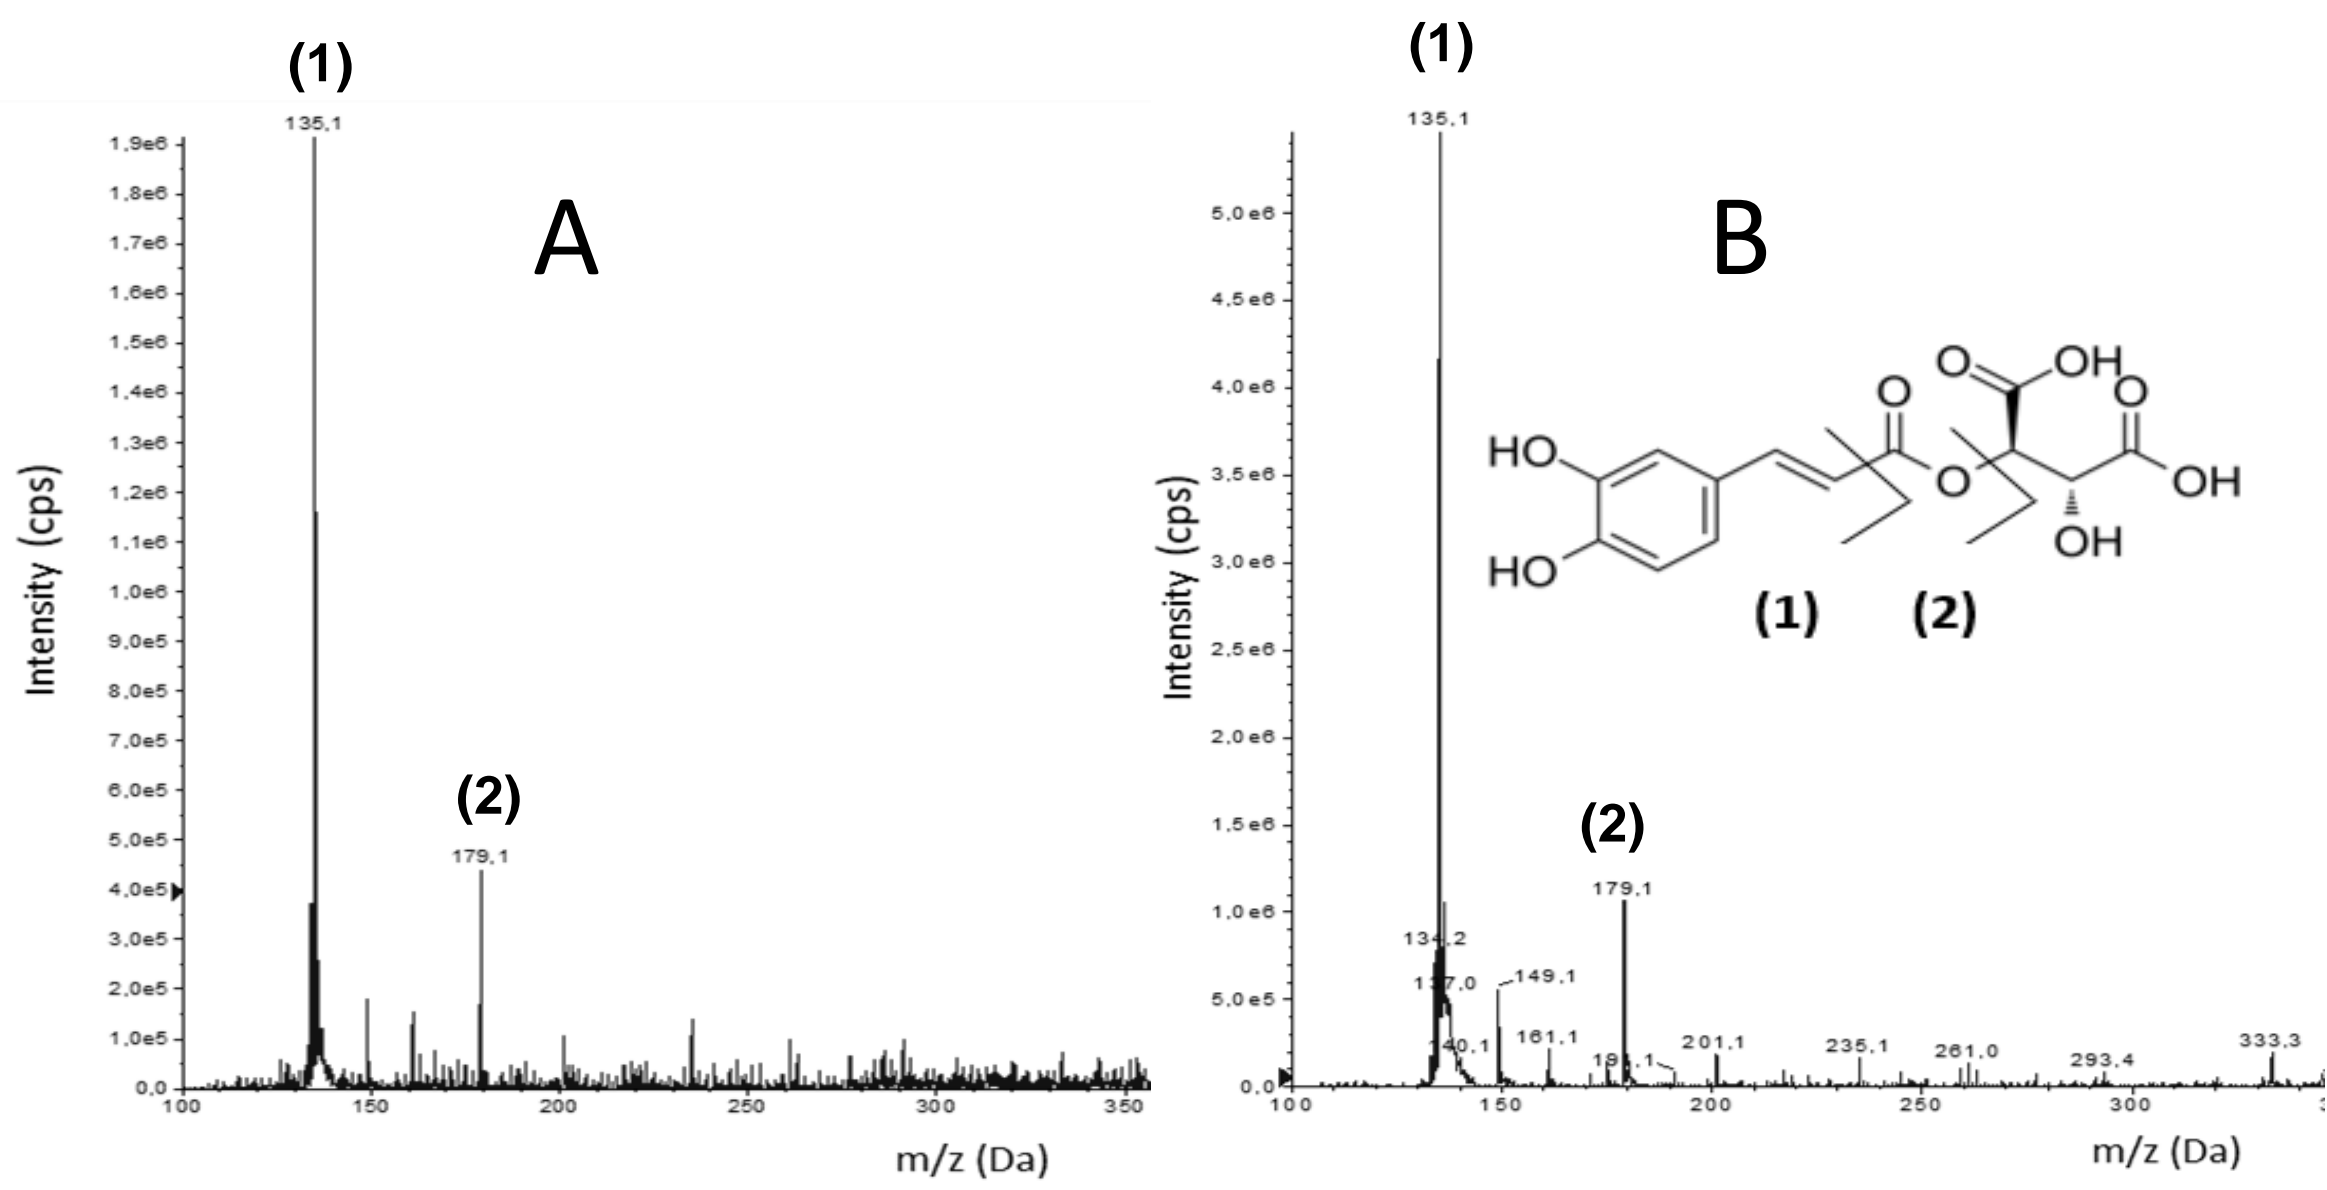

Figure 2. Mass spectrum of the chromatographic peak at 12.3 min: (A) caftaric acid standard solution, (B) wine lees extract.

### HPLC-HRMS

**Data-dependent acquisition mode (Full scan+MS/MS):**

- Standard available at the lab: the MS spectrum of the peak of the extract was compared to that of the standard.
- Standard not available at the lab: HRMS data bases were used.
  - The chromatogram corresponding to m/z of [M-H]<sup>-</sup> was extracted. If a peak was detected, the exact mass was compared with the actual mass of the compound.
  - The MS/MS spectrum of the peak of the extract was compared with the spectrum of the standard reported in the data base.

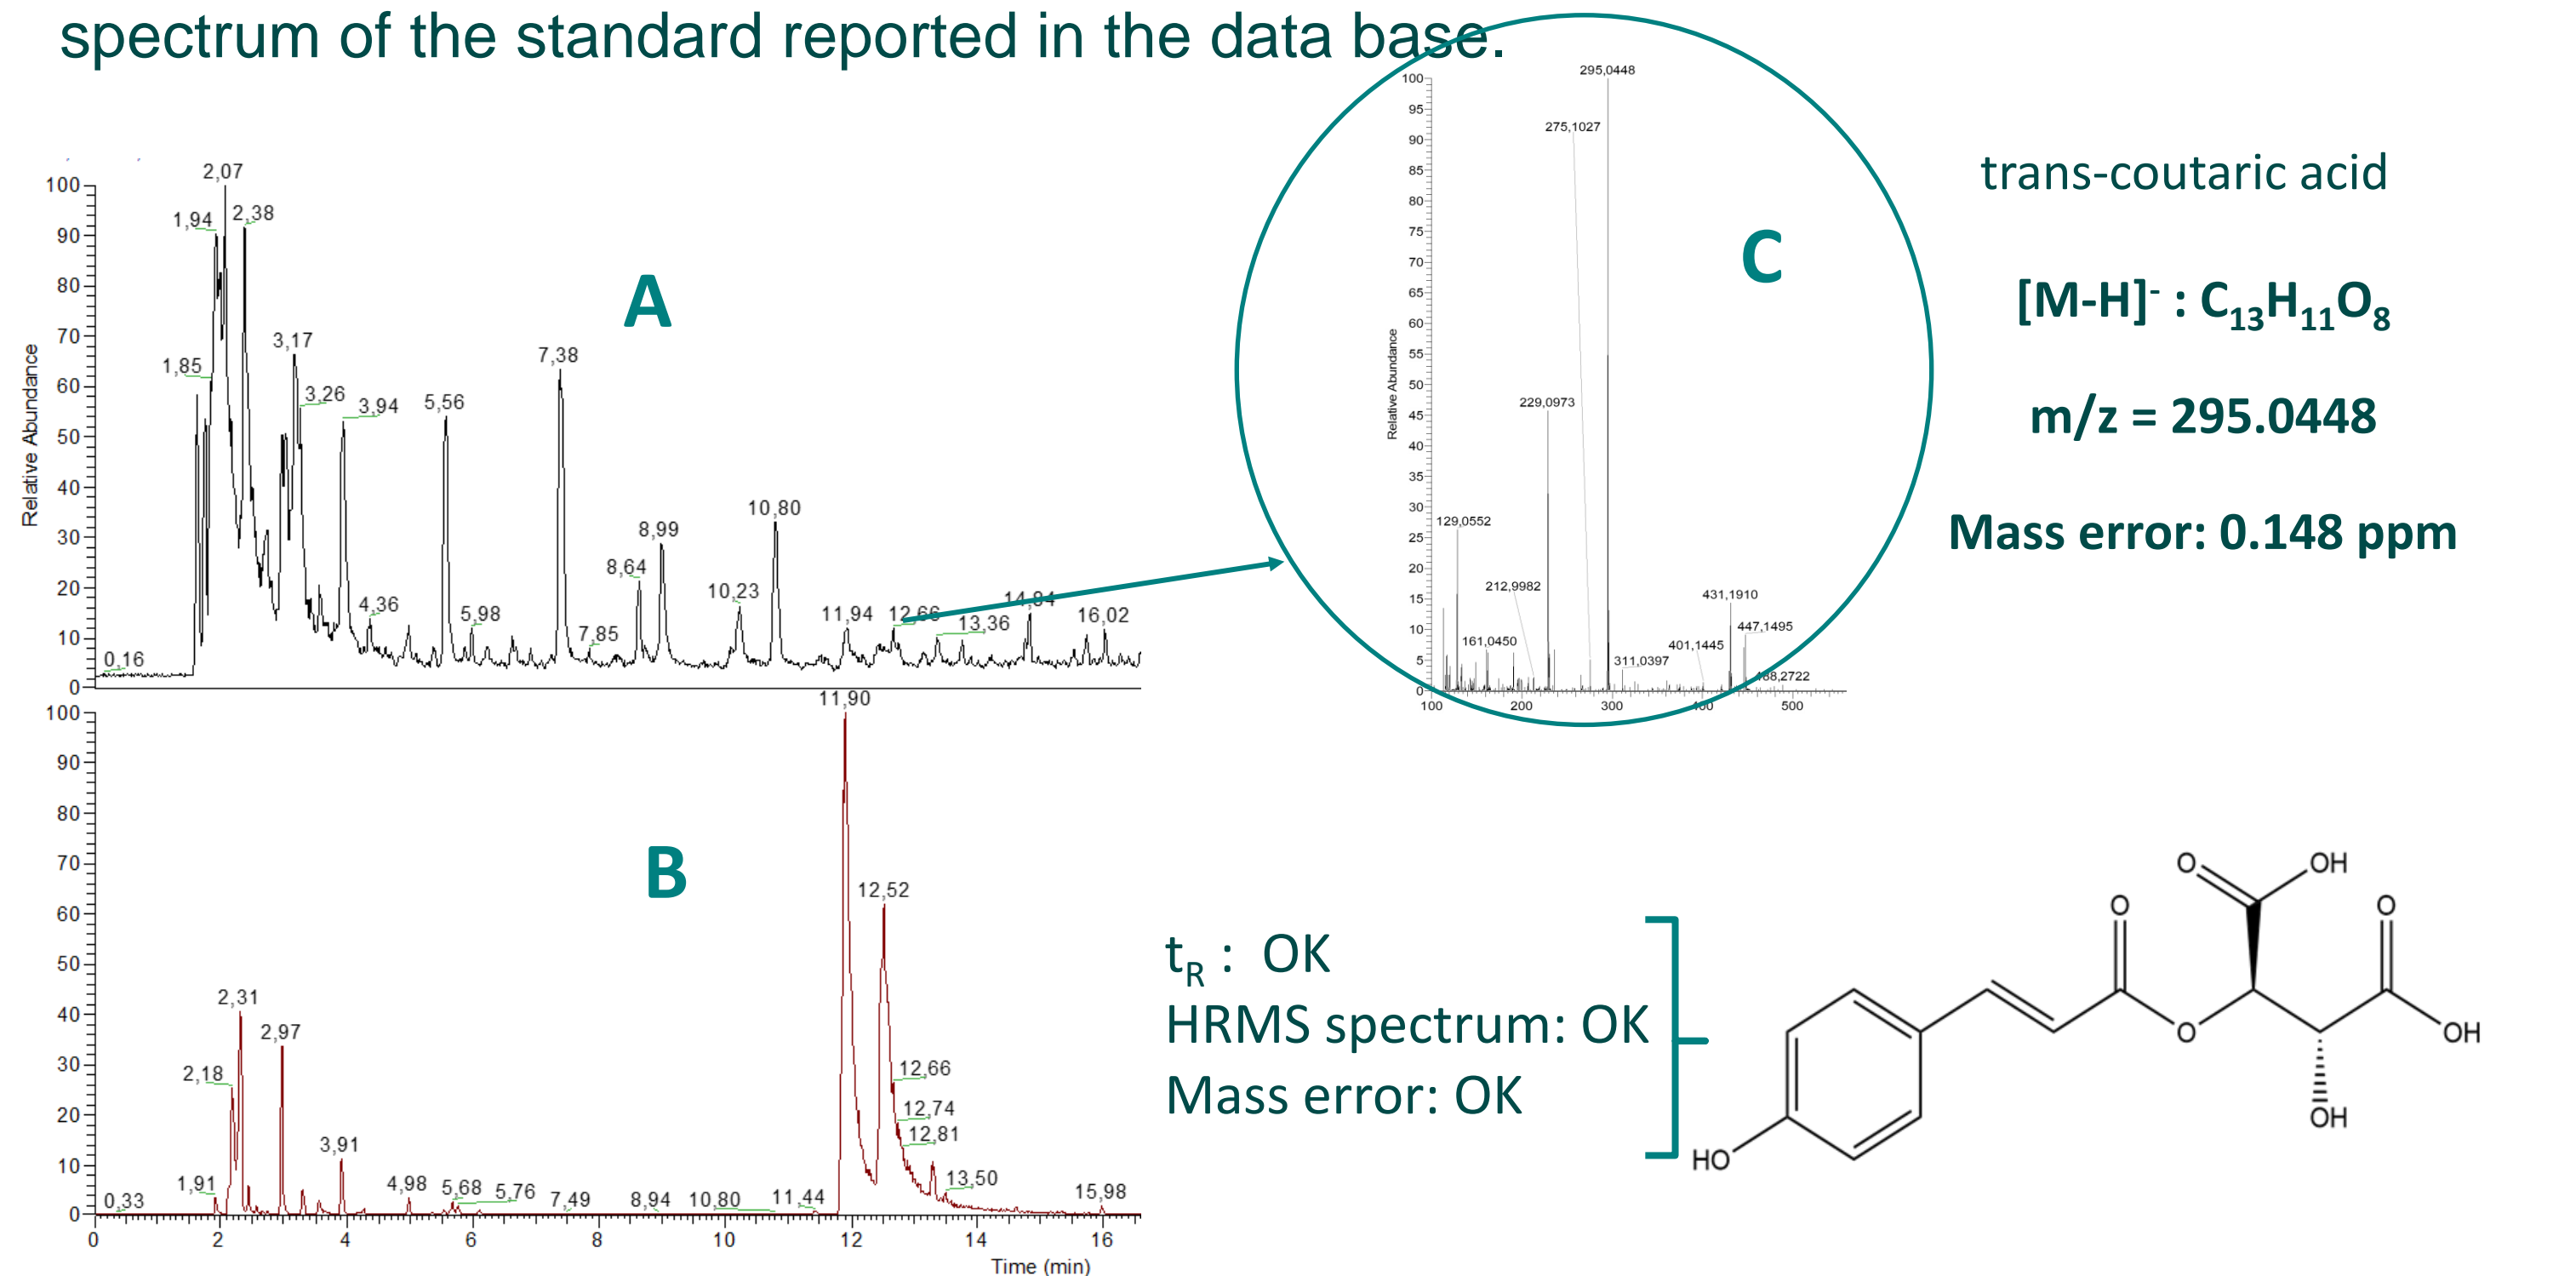

Figure 3. Total ion chromatogram (A), extracted chromatogram (m/z 295-296) (B), and the corresponding mass spectrum of the chromatographic peak at 12.5 min (C) of a lees extract.

### POLYPHENOL CONTENT IN LEES EXTRACTS

**Multiple reaction monitoring (MRM)** mode was used for confirmation and quantification of compounds, previously identified by HRMS, using the corresponding standards

Table 1. Polyphenols identified in lees extract and concentration levels.

| Compound                      | t <sub>R</sub> (min) | Concentration (mg L <sup>-1</sup> ) |
|-------------------------------|----------------------|-------------------------------------|
| (1) Gallic acid               | 6.41                 | 13.3                                |
| (2) 3,4-hydroxybenzoic acid   | 10.05                | 0.5                                 |
| (3) Caftaric acid             | 12.32                | 21.1                                |
| (4) Chlorogenic Acid          | 14.05                | 5                                   |
| (5) Catechin                  | 14.11                | 11.1                                |
| (6) cis-coutaric acid         | 14.17                |                                     |
| (7) 2,5-Dihydroxybenzoic acid | 14.33                | 2.8                                 |
| (8) trans-coutaric acid       | 14.92                | 16.3                                |
| (9) Caffeic acid              | 15.47                | 20.2                                |
| (10) Syringic acid            | 15.52                | 0.08                                |
| (11) Epicatechin              | 15.8                 | 11.7                                |
| (12) Ethyl gallate            | 17.27                | 10.8                                |
| (13) Rutin                    | 17.55                | 0.02                                |
| (14) p-coumaric acid          | 17.81                | 2.86                                |
| (15) Ferulic acid             | 18.34                | 0.5                                 |
| (16) Astilbin                 | 18.44                | 1                                   |
| (17) Resveratrol              | 19.21                | 0.51                                |

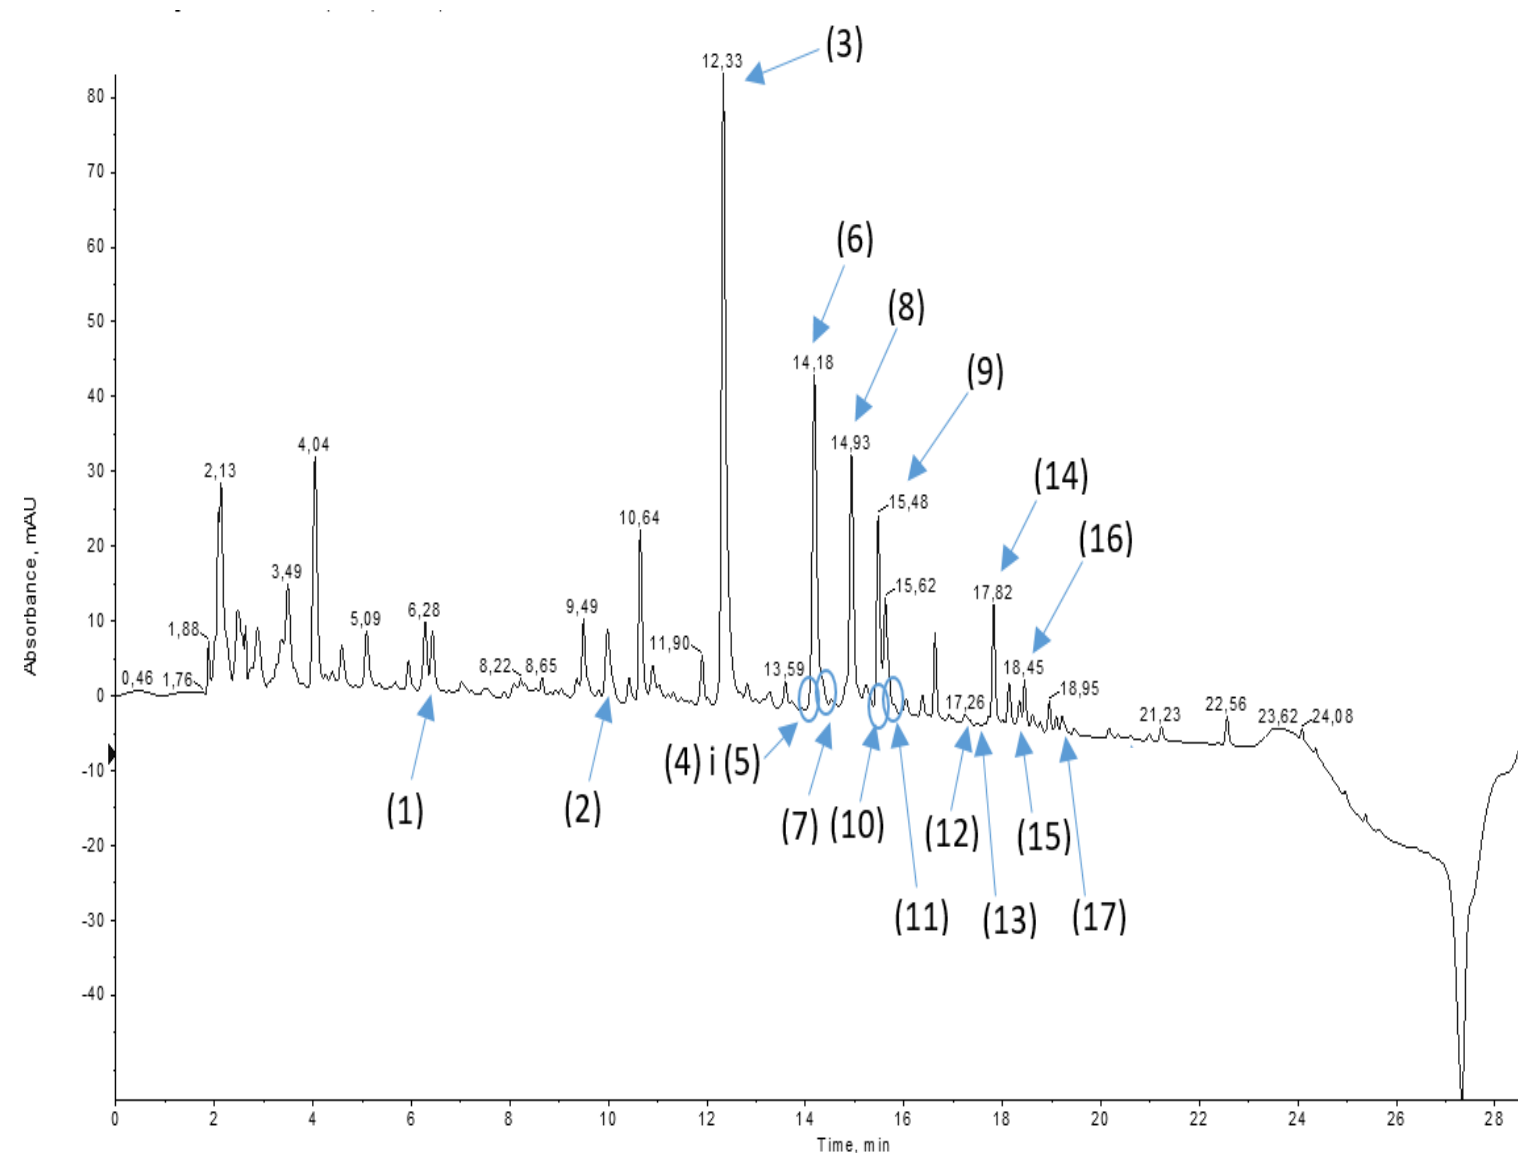

Figure 4. Chromatogram of a lees extract. See Table 1 for peaks assignment.

## ACKNOWLEDGMENTS

This research was supported by the R2MIT (CTM2017-85346-R) project financed by the Spanish Ministry of Economy and Competitiveness, the W4V (PID2020-114401RB-C22) project financed by the Spanish Ministry of Science and Innovation, and the Catalan Government (2017-SGR-312).
